# Supplementary material
Source: PubMed Central journal article supplement (PMC8761510)

| Subgroup            | N(mortality)            | Odds Ratio(95%CI)         |  | p            |
|---------------------|-------------------------|---------------------------|--|--------------|
| <b>All patients</b> | <b>712/3880(18.35%)</b> | <b>0.883(0.869-0.898)</b> |  | <b>0.000</b> |
| <b>AGE(years)</b>   |                         |                           |  | <b>0.018</b> |
| <50                 | 357/2134(16.73%)        | 0.866(0.845-0.887)        |  | 0.000        |
| >50                 | 355/1746(20.33%)        | 0.901(0.881-0.921)        |  | 0.000        |
| <b>Gender</b>       |                         |                           |  | <b>0.900</b> |
| male                | 533/2858(18.65%)        | 0.882(0.865-0.899)        |  | 0.000        |
| female              | 179/1022(17.51%)        | 0.888(0.861-0.917)        |  | 0.000        |
| <b>Cirrhosis</b>    |                         |                           |  | <b>0.000</b> |
| Yes                 | 626/2774(22.57%)        | 0.897(0.881-0.912)        |  | 0.000        |
| No                  | 86/1106(7.78%)          | 0.884(0.836-0.936)        |  | 0.000        |
| <b>Etiology</b>     |                         |                           |  | <b>0.954</b> |
| <b>Alcohol</b>      |                         |                           |  | <b>0.000</b> |
| Yes                 | 134/719(18.64%)         | 0.907(0.877-0.937)        |  | 0.000        |
| No                  | 578/3161(18.29%)        | 0.874(0.857-0.891)        |  | 0.000        |
| <b>HBV</b>          |                         |                           |  | <b>0.782</b> |
| Yes                 | 467/2739(17.05%)        | 0.866(0.849-0.885)        |  | 0.000        |
| No                  | 202/1141(17.70%)        | 0.916(0.891-0.942)        |  | 0.000        |
| <b>With NUCs</b>    |                         |                           |  | <b>0.752</b> |
| Yes                 | 157/920(17.07%)         | 0.879(0.850-0.909)        |  | 0.000        |
| No                  | 253/1266(19.98%)        | 0.856(0.829-0.885)        |  | 0.000        |
| <b>HE_grades</b>    |                         |                           |  | <b>0.000</b> |
| [0]                 | 579/3545(16.33%)        | 0.880(0.864-0.896)        |  | 0.000        |
| [1-2]               | 88/262(33.59%)          | 0.918(0.879-0.959)        |  | 0.000        |
| [3-4]               | 45/73(61.64%)           | 0.932(0.858-1.013)        |  | 0.096        |
| <b>Ascites</b>      |                         |                           |  | <b>0.000</b> |
| Yes                 | 468/1831(25.56%)        | 0.905(0.887-0.924)        |  | 0.000        |
| No                  | 244/2049(11.91%)        | 0.879(0.854-0.904)        |  | 0.000        |
| <b>Infection</b>    |                         |                           |  | <b>0.000</b> |
| Yes                 | 242/839(28.84%)         | 0.914(0.888-0.940)        |  | 0.000        |
| No                  | 470/3041(15.46%)        | 0.881(0.863-0.900)        |  | 0.000        |
| <b>TB(mg/dL)</b>    |                         |                           |  | <b>0.000</b> |
| [0,5]               | 180/2038(8.83%)         | 0.896(0.870-0.924)        |  | 0.000        |
| [5,12]              | 94/679(13.84%)          | 0.885(0.848-0.924)        |  | 0.000        |
| >12]                | 438/1154(37.95%)        | 0.929(0.907-0.951)        |  | 0.000        |
| <b>Cr(mg/dL)</b>    |                         |                           |  | <b>0.000</b> |
| [0,1.5]             | 658/3737(17.61%)        | 0.886(0.871-0.901)        |  | 0.000        |
| [1.5,2]             | 41/96(42.71%)           | 0.938(0.875-1.005)        |  | 0.070        |
| >2]                 | 12/31(38.71%)           | 0.751(0.597-0.946)        |  | 0.015        |
| <b>INR</b>          |                         |                           |  | <b>0.000</b> |
| [0,1.5]             | 169/2152(7.85%)         | 0.890(0.862-0.918)        |  | 0.000        |
| [1.5,2.5]           | 321/1327(24.19%)        | 0.920(0.898-0.943)        |  | 0.000        |
| ≥2.5]               | 218/360(60.56%)         | 0.950(0.913-0.988)        |  | 0.010        |

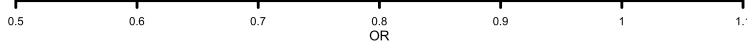

Supplement: 12072_2021_10282_MOESM4_ESM.pdf [file 12072_2021_10282_MOESM4_ESM.pdf]
