# Supplementary material
Source: PubMed Central journal article supplement (PMC8761510)
Supplement: 12072_2021_10282_MOESM5_ESM.pdf [file 12072_2021_10282_MOESM5_ESM.pdf]

**Figure 4a. Patients with cirrhosis (n=2774)**

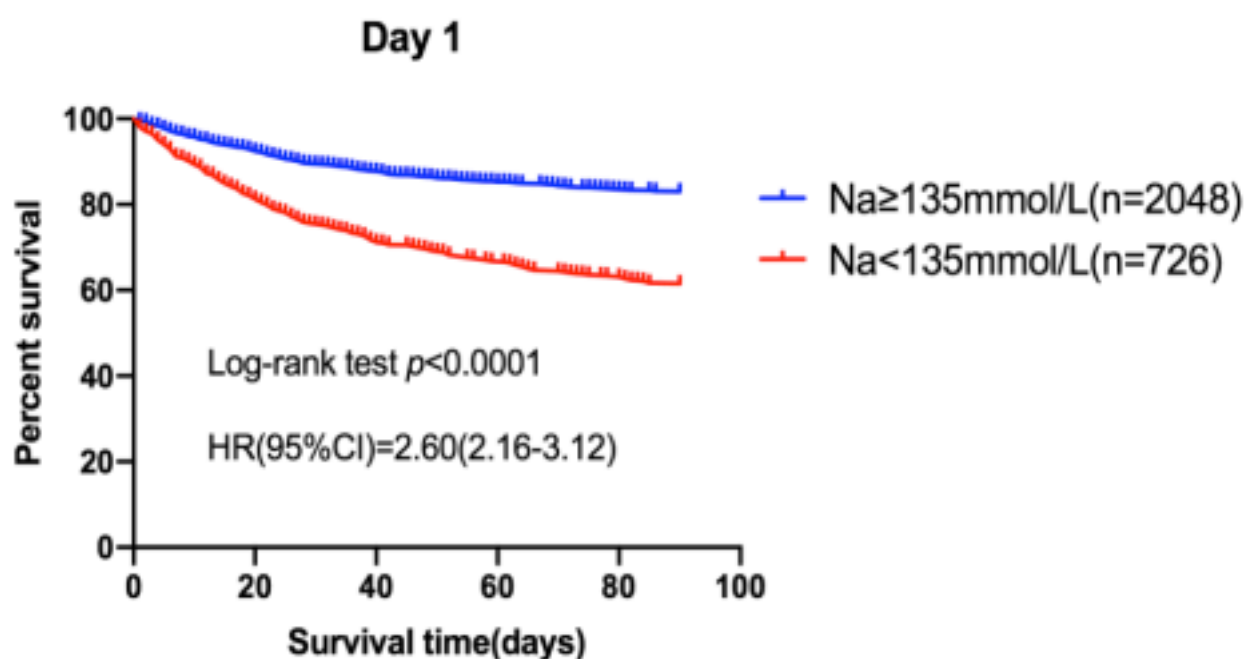

| sodium_cutoff | Total number | Adverse outcome | After adjusted |                     |
|---------------|--------------|-----------------|----------------|---------------------|
|               |              |                 | number         | Percentage survival |
| <135          | 726          | 279             | 447            | 61.5%               |
| $\geq 135$    | 2048         | 347             | 1701           | 83.0%               |
| All           | 2774         | 626             | 2148           | 77.4%               |
