# Supplementary material
Source: PubMed Central journal article supplement (PMC8761510)
Supplement: 12072_2021_10282_MOESM6_ESM.pdf [file 12072_2021_10282_MOESM6_ESM.pdf]

**Figure 4b. Patients without cirrhosis (n=1106)**

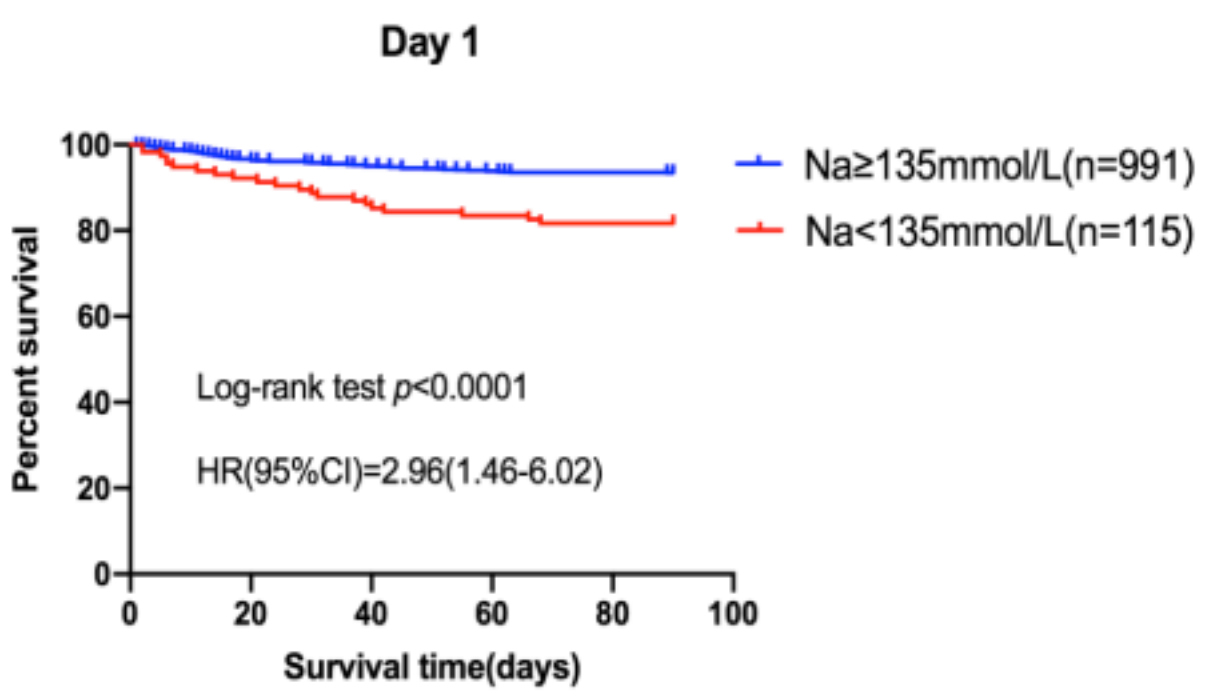

| sodium_cutoff | Total number | Adverse outcome | After adjusted |                     |
|---------------|--------------|-----------------|----------------|---------------------|
|               |              |                 | number         | Percentage survival |
| <135          | 115          | 21              | 94             | 81.7%               |
| $\geq 135$    | 991          | 65              | 926            | 93.4%               |
| All           | 1106         | 86              | 1020           | 92.2%               |
