# Supplementary material
Source: PubMed Central journal article supplement (PMC8761510)

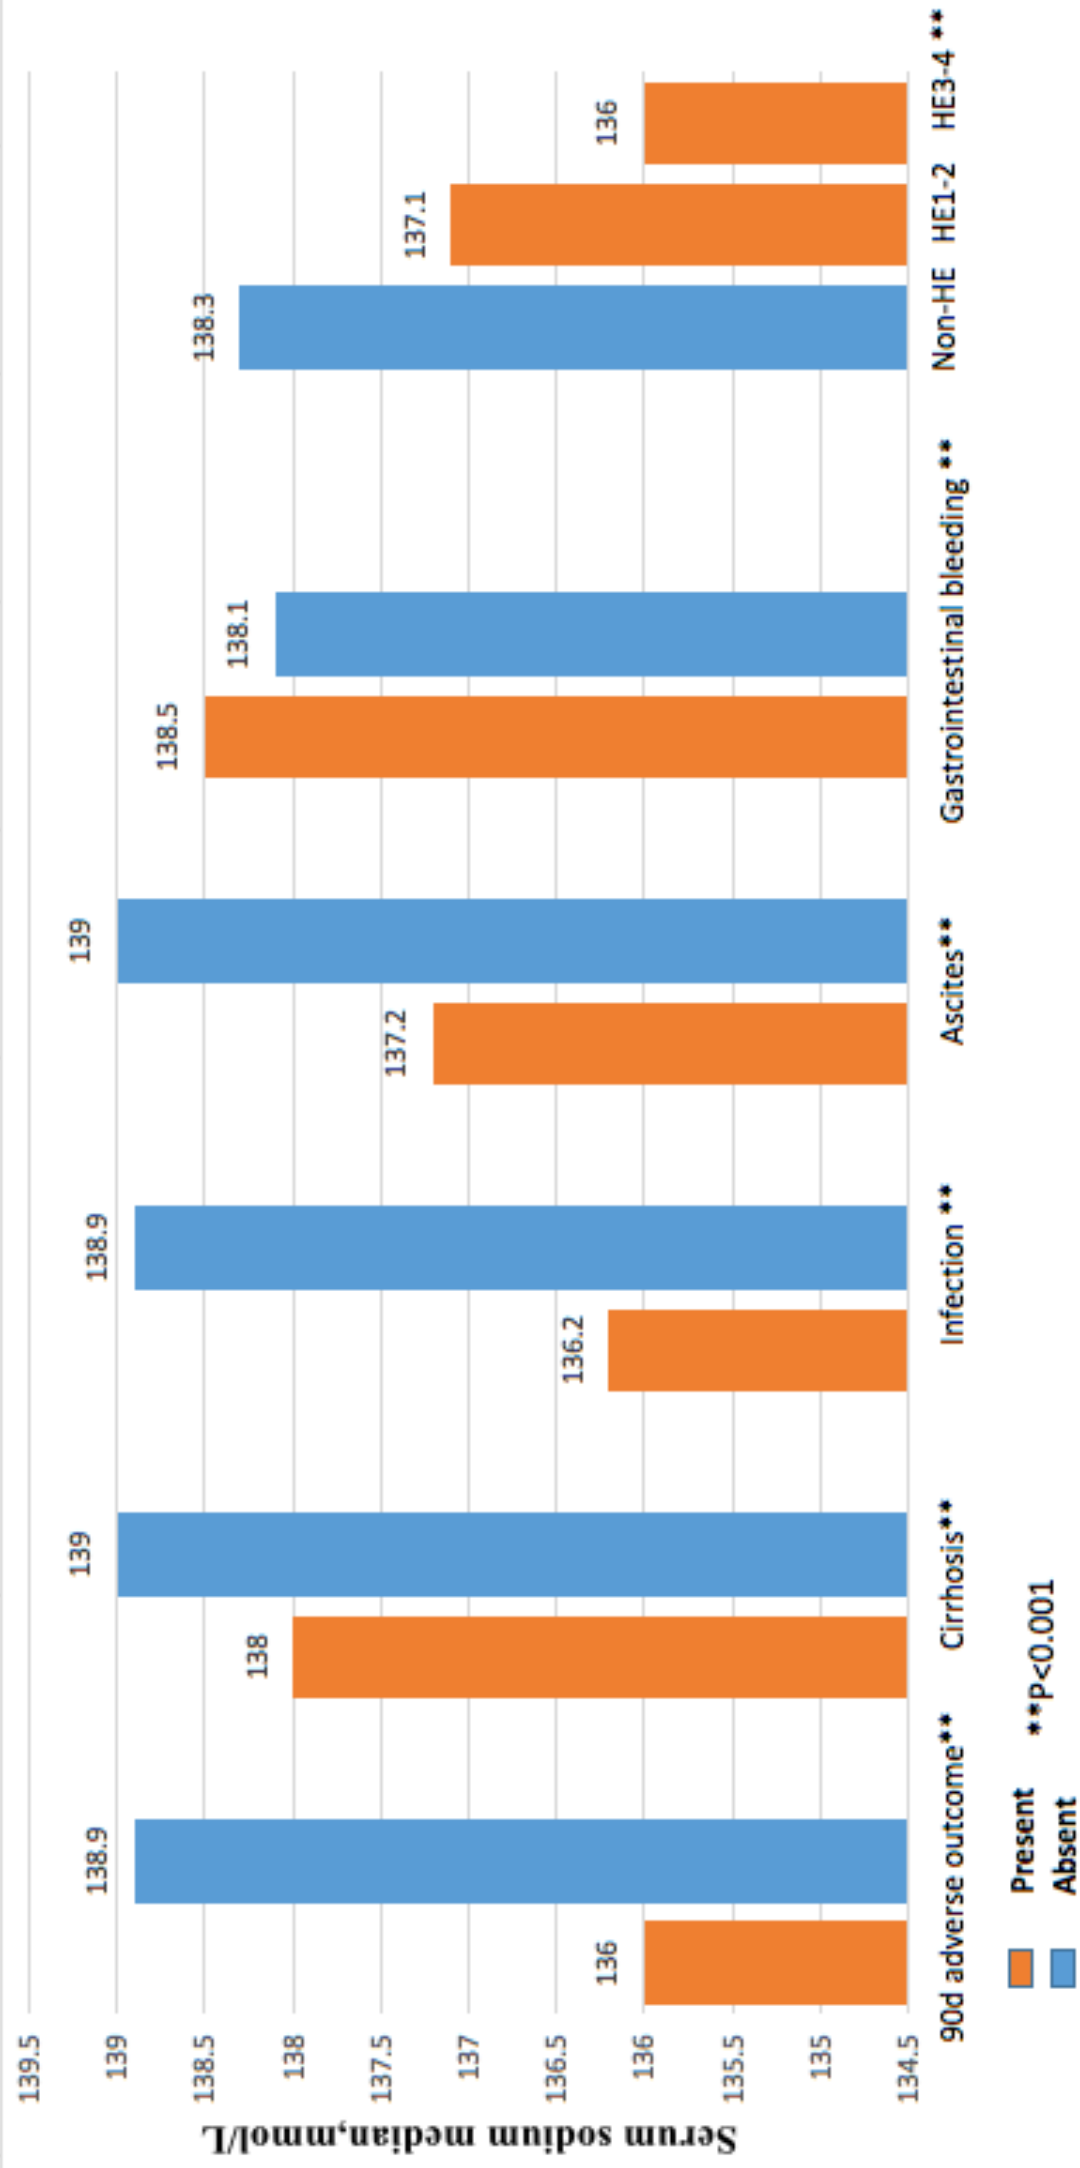

Supplement: 12072_2021_10282_MOESM2_ESM.pdf [file 12072_2021_10282_MOESM2_ESM.pdf]

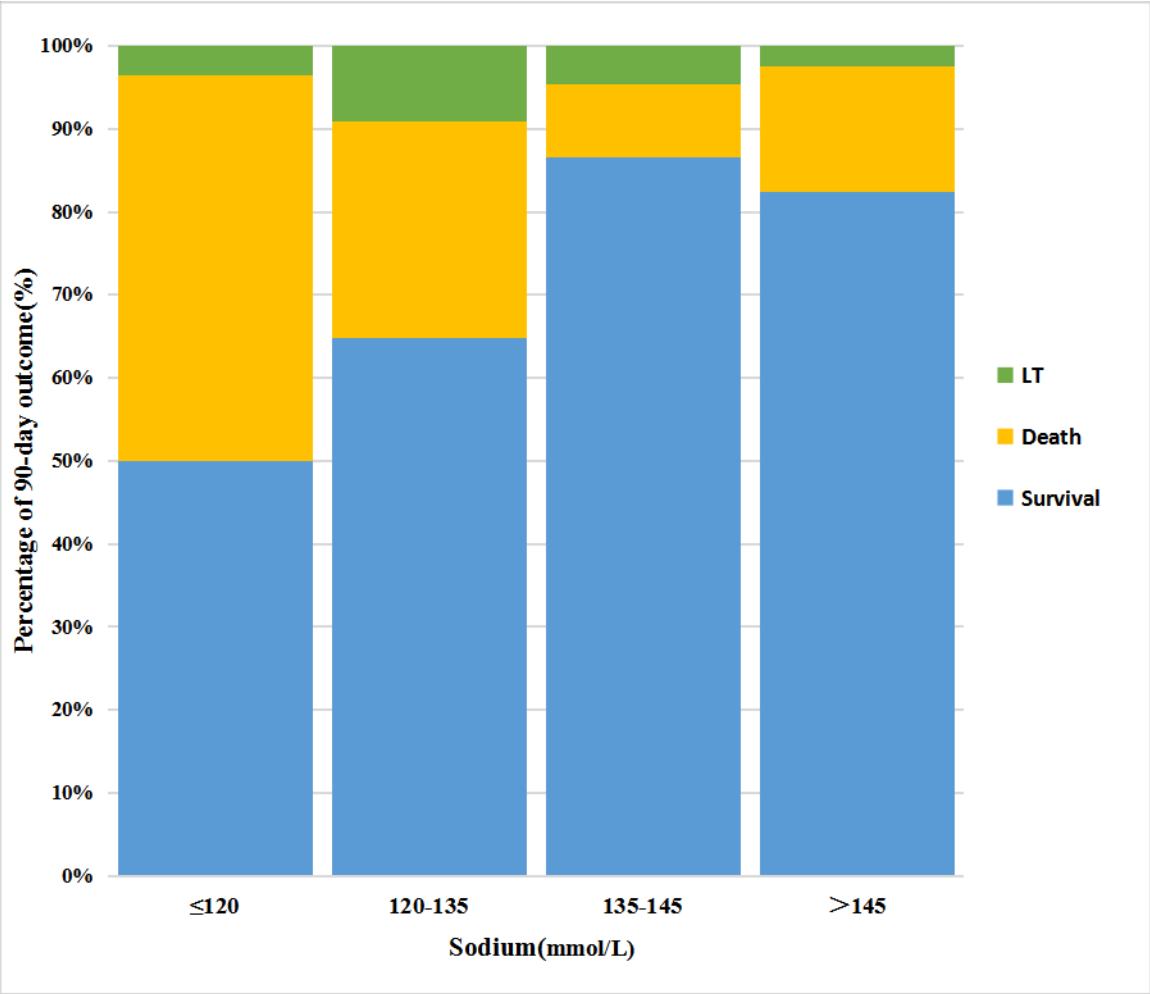

Supplement: 12072_2021_10282_MOESM3_ESM.pdf [file 12072_2021_10282_MOESM3_ESM.pdf]
